**TITLE: “Is voice a biomarker for autism spectrum disorder? A systematic review and meta-analysis.”**

Riccardo Fusaroli<sup>1</sup>, Anna Lambrechts<sup>2</sup>, Dan Bang<sup>1,3</sup>, Dermot Bowler<sup>2</sup>, Sebastian Gaigg<sup>2</sup>

1. The Interacting Minds Centre, Aarhus University, Jens Christian Skous Vej 4, Building 1483, 8000 Aarhus, DK

2. Autism Research Group, City University London, Northampton Square, London EC1V 0HB

3. Wellcome Trust Centre for Neuroimaging, Institute of Neurology, University College London, 12 Queen Square, London WC1N 3BG, UK

RUNNING TITLE: Vocal Production in ASD

Number of text pages: 21

Number of tables: 5

Number of figures: 6

Corresponding author: Riccardo Fusaroli, e-mail: [Fusaroli@dac.au.dk](mailto:Fusaroli@dac.au.dk), tel: +45

28890881, address: Jens Christian Skous vej 2, 8000 Aarhus Denmark

Grant sponsor: Interacting Minds Center; Grant ID: Clinical Voices

**Lay Abstract:** Individuals with Autism Spectrum Disorder (ASD) are reported to speak in distinctive ways. Distinctive vocal production should be better understood as it can affect social interactions and social development and could represent a non-invasive biomarker for ASD. We systematically review the existing scientific literature reporting quantitative acoustic analysis of vocal production in ASD. We identify repeated and consistent findings of higher pitch mean and variability but not of other differences in acoustic features. We identify a recent approach relying on multiple aspects of vocal production and machine learning algorithms to automatically identify ASD from voice only. This latter approach is very promising, but requires more systematic replication and comparison across languages and contexts. We outline three recommendations to further develop the field: open data, open methods, and theory-driven research.

**Scientific Abstract** Individuals with Autism Spectrum Disorder (ASD) tend to show distinctive, atypical acoustic patterns of speech. These behaviours affect social interactions and social development and could represent a non-invasive biomarker for ASD. We systematically reviewed the literature quantifying acoustic patterns in ASD. Search terms were: (prosody OR intonation OR inflection OR intensity OR pitch OR fundamental frequency OR speech rate OR voice quality OR acoustic) AND (autis\* OR Asperger). Results were filtered to include only: empirical studies quantifying acoustic features of vocal production in ASD, with a sample size  $> 2$ , and the inclusion of a neurotypical comparison group and/or correlations between acoustic measures and severity of clinical features. We identified 32 articles, including 27 univariate studies and 15 multivariate machine-learning studies. We performed meta-analyses of the univariate studies, identifying significant differences in mean pitch and pitch range between individuals with ASD and controls (Cohen's  $d$  of about 0.4 and discriminatory accuracy of about 61%). The multivariate studies reported higher accuracies than the univariate studies (63-96%). However, the methods used and the acoustic features investigated were too diverse for performing meta-analysis. We conclude that multivariate studies of acoustic patterns are a promising but yet unsystematic avenue for establishing ASD biomarkers. We outline three recommendations for future studies: open data, open methods, and theory-driven research.

**Key Words:** Voice, Speech, Acoustic properties, Machine Learning, Biomarker

## 1. Introduction

From its earliest characterizations, ASD has been associated with peculiar tones of voice and disturbances of prosody (Asperger, 1944; Goldfarb, Braunstein, & Lorge, 1956; Kanner, 1943; Pronovost, Wakstein, & Wakstein, 1966; Simmons & Baltaxe, 1975). Although 70-80% of individuals with ASD develop functional spoken language, at least half of the ASD population displays early atypical acoustic patterns (Paul et al., 2005a; Rogers et al., 2006; Shriberg et al., 2001), which persist while other aspects of language improve (Baltaxe & Simmons, 1985; Depape, Chen, Hall, & Trainor, 2012). These atypical acoustic patterns have been qualitatively described as flat, monotonous, variable, sing-songy, pedantic, robot- or machine-like, hollow, stilted or exaggerated and inappropriate (Amorosa, 1992; Baltaxe, 1981; Depape, et al., 2012; Järvinen-Pasley, Peppé, King-Smith, & Heaton, 2008; Lord, Rutter, & Le Couteur, 1994). Such distinctive vocal characteristics are one of the earliest-appearing markers of a possible ASD diagnosis (Oller et al., 2010; Paul, Fuerst, Ramsay, Chawarska, & Klin, 2011; Warlaumont, Richards, Gilkerson, & Oller, 2014).

An understanding of vocal production in ASD is important because acoustic abnormalities may play a role in the social-communicative impairments associated with the disorder (Depape, et al., 2012; Klopfenstein, 2009). For example, individuals with ASD have difficulties with the communication of affect (Travis & Sigman, 1998) – which relies on the production of prosodic cues – leading to negative social judgments from others (Fay & Schuler, 1980; Paul et al., 2005b; Shriberg, et al., 2001; Van Bourgondien & Woods, 1992) and in turn social withdrawal and social anxiety (Alden & Taylor, 2004). Such disruption of communication and interaction may have long-term

effects, compromising the development of social-communicative abilities (Warlaumont, et al., 2014).

Atypical prosody is already considered a marker for ASD in gold-standard diagnostic assessments such as the Autism Diagnostic Observation Schedule (Lord, et al., 1994), and recent evidence indicates that speech in ASD may be characterized by relatively unique acoustic features that can be quantified objectively (Bone et al., 2013; Fusaroli, Lambrechts, Yarrow, Maras, & Gaigg, 2015; Oller, et al., 2010). Prosody production has also been argued to be a “bellwether” behavior that can serve as a marker of the specific cognitive and social functioning profile of an individual (Bone et al., 2014; Diehl, Berkovits, & Harrison, 2010; Paul, et al., 2005a). Such diagnostic profiling is especially needed now that the diagnosis of ASD (since the publication of the DSM-5) pools together previously distinct disorders (e.g., Asperger syndrome and childhood disintegrative disorder).

Studies of prosody in ASD can be grouped according to four key aspects of speech production: pitch, volume, duration and voice quality (Cummins et al., 2015; Titze, 1994). The speech of individuals with ASD has been described as monotone, as having inappropriate pitch and pitch variation (Baltaxe, 1984; Fay & Schuler, 1980; Goldfarb, Goldfarb, Braunstein, & Scholl, 1972; Paccia & Curcio, 1982; Pronovost, et al., 1966) and as being too loud or too quiet, sometimes inappropriately shifting between the two (Goldfarb, et al., 1972; Pronovost, et al., 1966; Shriberg, Paul, Black, & van Santen, 2011; Shriberg, et al., 2001). Further, individuals with ASD have been reported to speak too quickly or too slowly (Baltaxe, 1981; Goldfarb, et al., 1972; Simmons & Baltaxe, 1975) and many descriptions of their speech have highlighted a distinctive voice

quality characterized as “hoarse”, “harsh” and “hyper-nasal” (Baltaxe, 1981; Pronovost, et al., 1966), with a higher recurrence of squeals, growls, and yells (Sheinkopf, Mundy, Oller, & Steffens, 2000).

The research evidence is diverse, in terms of both methods and interpretations. An early review of 16 qualitative studies of speech in ASD found it difficult to draw any firm conclusions (McCann & Peppé, 2003). Shortcomings of the reviewed studies were: (1) small sample size; (2) underspecified criteria for the (qualitative) descriptions of speech production; (3) lack of quantitative measures of speech production; (4) use of heterogeneous and non-standardized tasks; and (5) little theory-driven research. Since that review, the literature on prosody in ASD has grown substantially, particularly with respect to the use of signal-processing techniques that overcome some of the limitations involved in qualitative studies (Banse & Scherer, 1996; Grossman, Bemis, Skwerer, & Tager-Flusberg, 2010). The purpose of the present paper is to provide a systematic and critical review of recent research on the acoustic quantitative characteristics of speech production in ASD. This focus ensures minimal overlap with the literature reviewed by McCann & Peppé (2003) and is motivated by the more general question of whether automated speech-processing procedures can be used in the diagnosis of ASD.

We identified two different groups of studies: univariate studies and multivariate machine-learning studies. Univariate studies seek to identify differences between ASD and control groups by investigating one acoustic feature at a time. In contrast, multivariate machine-learning studies use multiple features (multivariate) to build statistical models that can classify previously unheard voice samples into ASD and control groups (machine-learning). A particular focus of this review will be whether

acoustic characteristics of speech production can be used as biomarkers of ASD – that is, as objective measures that are a reliable indicator of the disorder and/or of more specific clinical features of ASD.

The review will be structured as follows. Section 2 will define the search and selection criteria for the literature review. Section 3 and 4 will present the results of the review. Section 3 focuses on univariate studies and, where more than five studies focused on the same feature, provides meta-analyses of the effect sizes. Section 4 focuses on multivariate studies and in particular the attempt to use machine-learning techniques to develop biomarkers of ASD. We end by critically assessing the findings and advancing recommendations for future research.

## **2. Methods: The criteria for the literature search**

A literature search was conducted using Google Scholar, PubMed and Web of Science on April 15 2015 and updated on March 4 2016. The search terms used were (prosody OR intonation OR inflection OR intensity OR pitch OR fundamental frequency OR speech rate OR voice quality OR acoustic) AND (autis\* OR Asperger). The papers thus found were searched for additional references and the resulting set was screened by two of the authors (RF and AL) according to the following criteria: empirical study, quantification of acoustic features in the vocal production of participants with ASD, sample including at least two individuals with ASD, inclusion of a typically developing comparison group (TD) or an assessment of variation in acoustic features in relation to severity of clinical features.

For all resulting papers we report sample sizes for ASD and TD groups, age, speech production task, results and estimates of the acoustic measures (mean and standard deviation) if available, in dedicated tables (see Tables 1 to 5). To facilitate comparison between studies, the vocal production tasks were grouped into three categories. The first category, constrained production, includes tasks such as reading aloud and repeating linguistic stimuli. In this category, the focus is on the form of speech production, more than on its contents (e.g. the actual words and meaning expressed). The second category, spontaneous production, includes tasks such as free description of pictures and videos or telling stories. This category of tasks involves a more specific focus on the contents of speech production. The third category, social interaction, includes spontaneous and semi-structured conversations such as ADOS interviews. This category adds a stronger emphasis on social factors and interpersonal dynamics.

We extracted statistical estimates (mean and standard deviation for the ASD and TD groups) of the features when available and contacted the corresponding authors of the articles that did not provide these statistics<sup>1</sup>. When this process yielded statistical estimates of one feature from at least five independent studies, we ran a meta-analysis to estimate an overall effect size – that is, a weighted standardized mean difference (Cohen's  $d$ ) between the ASD and the TD groups for univariate studies and sensitivity/specificity of classification for the multivariate machine-learning studies. We note that only the univariate studies provided enough data to perform meta-analyses.

---

<sup>1</sup> Additional data were provided by the authors of (Bonneh, Levanon, Dean-Pardo, Lossos, & Adini, 2011; Grossman, et al., 2010), whom we gratefully acknowledge. As these data are fully reported in the publicly accessible dataset we will not further distinguish it from the data reported in the articles reviewed.



Meta-analyses were performed following well-established procedures detailed in (Doebler & Holling, 2015; Field & Gillett, 2010; Quintana, 2015; Viechtbauer, 2010). We first calculated the size (Cohen's  $d$ ), statistical significance ( $p$ -value) and overall variance (or  $\tau^2$ ) of effects observed across studies. We then assessed whether the overall variance could be explained by within-study variance (e.g., due to measurement noise or heterogeneity in the ASD samples included in the studies) using Cochran's  $Q$  (Cochran, 1954) and  $I^2$  statistics (Higgins, Thompson, Deeks, & Altman, 2003). Third, we assessed whether systematic factors – speech production task (constrained production, spontaneous production, social interaction) and language employed in the task (e.g. American English, or Japanese)<sup>2</sup> – could further explain the overall variance. Finally, we investigated the effect of influential studies (single studies strongly driving the overall results) and publication bias (tendency to write up and publish only significant findings, ignoring null findings and making the literature unrepresentative of the actual population studied) on the robustness of our analysis. This was estimated using rank correlation tests assessing whether lower sample sizes (and relatedly higher standard error) were related to bigger effect sizes. A significant rank correlation indicates a likely publication bias and inflated effect sizes due to small samples. All analyses were performed using the `metafor` v.1.9.8 and `mada` v.0.5.7 packages in R 3.2.2. All data and R-code employed are available at <https://github.com/fusaroli/AcousticPatternsInASD>.

### 3. Results

---

<sup>2</sup> We did not include age as a factor for two reasons. First, several studies spanned age ranges that would make them eligible for inclusion as either studies of adults or children. Second, we could not make a clear cut-off around puberty, which is known to strongly affect acoustic production

### **3.1. Literature search results**

The initial literature screening yielded 106 papers discussing prosody and voice in ASD. The second stricter screening yielded 32 papers, with each paper sometimes reporting more than one study. In total, our primary literature included 27 univariate studies and 15 multivariate machine-learning studies. The remaining 74 papers (qualitative studies, theory or reviews) were used as background literature only and cited when relevant.

### **3.2. Differences in acoustic patterns between ASD and control populations (univariate studies)**

#### **3.2.1. Pitch**

Pitch reflects the frequency of vibrations of the vocal cords during vocal production. During vocal production, individuals often modulate their pitch to convey pragmatic or contextual meaning: for example, marking an utterance as having an imperative, declarative or ironic intent, or even to express emotions (Banse & Scherer, 1996; Bryant, 2010; Fusaroli & Tylén, 2016; Michael et al., 2015; Mushin, Stirling, Fletcher, & Wales, 2003).

Our literature screening yielded 21 studies employing acoustic measures of pitch (cf. Tables 1-2). Four summary statistics were used: mean, standard deviation (SD), range (defined between highest and lowest pitch) and coefficient of variation (standard deviation divided by mean). Some researchers also quantified the temporal trajectory or

profile of pitch, estimating the slope (ascending, descending or flat) of pitch over time (Bone, et al., 2014; Green & Tobin, 2009). We report the latter measures when the signal-processing is automated and does not rely on manual coding.

*Table 1 – Summary statistics of the pitch properties of ASD and TD groups in each study. When present, or provided by the authors, mean and standard deviation (in parenthesis) of the summary statistics are reported. NS: Non-significant difference between groups.*

| Authors                                           | Sample Size     | Age    | Task                                         | Findings                                                                                                                                |
|---------------------------------------------------|-----------------|--------|----------------------------------------------|-----------------------------------------------------------------------------------------------------------------------------------------|
| (Brisson, Martel, Serres, Sirois, & Adrien, 2014) | 13 ASD<br>13 TD | 0-6 m  | Social Interaction                           | Pitch mean: NS<br>ASD: 393.61 Hz (107.19); TD: 357.64 Hz (37.17)                                                                        |
| (Sharda et al., 2010)                             | 15 ASD<br>10 TD | 4-10 y | Social Interaction                           | Pitch Mean: Higher<br>ASD: 355.8 Hz (61.7); TD: 275.4Hz (22.5)<br>Pitch Range: Wider<br>ASD: 550.6 Hz (84.9); TD: 464.7 Hz (41.2)       |
| (Filipe, Frota, Castro, & Vicente, 2014)          | 12 ASD<br>17 TD | 4-6 y  | Spontaneous Production (lexical elicitation) | Pitch mean: Higher<br>ASD: 264.72 Hz (23.19); TD: 242.74 Hz (28.59)<br>Pitch range: Wider<br>ASD: 142. 3 Hz (47.4); TD: 97.5 Hz (36.38) |

|                                                                    |                 |         |                                                      |                                                                                                                                                |
|--------------------------------------------------------------------|-----------------|---------|------------------------------------------------------|------------------------------------------------------------------------------------------------------------------------------------------------|
| <b>(Diehl, Watson, Bennetto, McDonough, &amp; Gunlogson, 2009)</b> | 17 ASD<br>17 TD | 6-14 y  | Spontaneous<br>Production<br>(narrative elicitation) | Pitch Mean: NS<br>ASD: 212.25 Hz (36.48); TD: 207.84 Hz (34.93)<br>Pitch Range: Wider<br>ASD: 49.57 Hz (9.81); TD: 41.69 Hz (12.49)            |
| <b>(Diehl, et al., 2009)</b>                                       | 21 ASD<br>21 TD | 10-18 y | Spontaneous<br>Production<br>(Narrative elicitation) | Pitch Mean: NS<br>ASD: 189.95 Hz (35.11); TD: 173.57 Hz (42.25)<br>Pitch Range: Wider<br>ASD: 58.77 Hz (16.46); TD: 45.20 Hz (13.15)           |
| <b>(Scharfstein, Beidel, Sims, &amp; Finnell, 2011)</b>            | 30 ASD<br>30 TD | 7-13 y  | Social<br>Interaction                                | Pitch Mean: NS<br>ASD: 282.94 Hz (28.8); TD: 293.19 Hz (27.1)<br>Pitch Range: NS<br>ASD: 57.20 Hz (17.7); TD: 62.12 Hz (24.4)                  |
| <b>(Bonneh, et al., 2011)</b>                                      | 41 ASD<br>42 TD | 4-6.5 y | Spontaneous<br>Production<br>(lexical elicitation)   | Pitch Mean: NS<br>ASD: 190.89 Hz (57.87); TD: 155.82 Hz (47.51)<br>Pitch Range: Wider<br>ASD: 264 Hz (23); TD: 249 Hz (25)<br>Pitch SD: Higher |
| <b>(Fosnot &amp; Jun, 1999)</b>                                    | 4 ASD<br>4 TD   | 7-14 y  | Constrained<br>production<br>(reading and imitation) | Pitch range: Wider<br>Pitch SD: Higher                                                                                                         |
| <b>(Nadig &amp; Shaw, 2012)</b>                                    | 15 ASD<br>13 TD | 8-14 y  | Social<br>Interaction                                | Pitch Mean: NS<br>ASD 225 Hz; TD: 214 Hz<br>Pitch Range: Wider                                                                                 |

|                                               |        |        |                        |                                                               |
|-----------------------------------------------|--------|--------|------------------------|---------------------------------------------------------------|
| ASD Median: 200 Hz; TD Median: 124 Hz         |        |        |                        |                                                               |
| (Nadig & Shaw, 2012)                          | 15 ASD | 8-14 y | Spontaneous            | Pitch Mean: NS                                                |
|                                               | 11 TD  |        | Production             | ASD: 156 Hz; TD: 122 Hz                                       |
|                                               |        |        | (sentence elicitation) | Pitch Range: Wider<br>ASD: 156 Hz; TD: 122 Hz                 |
| (Diehl & Paul, 2012)                          | 24 ASD | 8-16 y | Constrained            | Pitch Mean: NS                                                |
|                                               | 22 TD  |        | production             | Pitch Range: NS                                               |
|                                               |        |        | (Imitation)            | Pitch SD: NS                                                  |
| (Diehl & Paul, 2013)                          | 24 ASD | 8-16 y | Spontaneous            | Pitch Mean: NS                                                |
|                                               | 22 TD  |        | Production             | Pitch Range: Wider                                            |
|                                               |        |        | (sentence elicitation) | Pitch SD: Higher                                              |
| (Grossman, et al., 2010)                      | 11 ASD | 7-17 y | Spontaneous            | Pitch Mean: NS                                                |
|                                               | 9 TD   |        | Production             | ASD: 190.89 Hz (57.87); TD: 155.82 Hz (47.51)                 |
|                                               |        |        | (lexical elicitation)  | Pitch Range: NS<br>ASD: 170 Hz (86.64); TD: 108.64 Hz (53.94) |
| (Hubbard & Trauner, 2007)                     | 18 ASD | 6-21 y | Constrained            | Pitch range: NS                                               |
|                                               | 10 TD  |        | production             |                                                               |
|                                               |        |        | (Imitation)            |                                                               |
| (Nakai, Takashima, Takiguchi, & Takada, 2014) | 6 ASD  | 4-6 y  | Spontaneous            | Pitch Range NS                                                |
|                                               | 16 TD  |        | Production             | ASD: 183.21 Hz (33.90); TD: 198.18 Hz (36.23)                 |
|                                               |        |        | (lexical elicitation)  | Pitch SD NS<br>ASD: 45.14 Hz (12.20); TD: 48.19 Hz (13.25)    |
|                                               |        |        |                        | Pitch CV: Higher                                              |

|                                              |        |         |                                     |                                                                                        |
|----------------------------------------------|--------|---------|-------------------------------------|----------------------------------------------------------------------------------------|
|                                              |        |         |                                     | ASD: 0.15 Hz (0.03); TD: 0.15 Hz (0.02)                                                |
| <b>(Nakai, et al., 2014)</b>                 | 20 ASD | 6-10 y  | Spontaneous                         | Pitch Range NS                                                                         |
|                                              | 21 TD  |         | Production                          | ASD: 202.13 Hz (34.27); TD: 224.39 Hz (48.13)                                          |
|                                              |        |         | (lexical elicitation)               | Pitch SD NS                                                                            |
|                                              |        |         |                                     | ASD: 50.26 Hz (12.32); TD: 61.73 Hz (17.09)                                            |
|                                              |        |         |                                     | Pitch CV: Higher                                                                       |
|                                              |        |         |                                     | ASD: 0.15 Hz (0.02); TD: 0.21 Hz (0.06)                                                |
| <b>(Green &amp; Tobin, 2009)</b>             | 10 ASD | 9-13 y  | Spontaneous                         | Pitch Range: NS                                                                        |
|                                              | 10 TD  |         | production & Constrained production | ASD: 10.7–37.6 semitones; TD: 30.4–32.4 semitones                                      |
|                                              |        |         |                                     |                                                                                        |
| <b>(Depape, et al., 2012)</b>                | 12 ASD | 17-34y  | Social                              | Pitch Mean: NS                                                                         |
|                                              | 6 TD   |         | Interaction                         | Pitch Range: Wider for High Functioning Autism, Narrower for Medium Functioning Autism |
| <b>(Kaland, Krahmer, &amp; Swerts, 2012)</b> | 20 ASD | 18-51 y | Spontaneous                         | Pitch Range: Lower                                                                     |
|                                              | 20 TD  |         | Production                          |                                                                                        |
|                                              |        |         | (sentence elicitation)              |                                                                                        |
| <b>(Chan &amp; To, 2016)</b>                 | 19 ASD | 18-34y  | Spontaneous                         | Pitch Mean: NS                                                                         |
|                                              | 19 TD  |         | Production                          | ASD: 137.67 Hz (18.69); TD: 123.24 (15.19)                                             |
|                                              |        |         | (narrative elicitation)             | Pitch SD: NS                                                                           |
|                                              |        |         |                                     | ASD: 27.35 Hz (7.86); TD: 22.16 (4.69)                                                 |

*Pitch mean* was investigated in 14 studies (323 participants with ASD and 311 controls). Only two of these studies reported a significant group difference with higher

pitch mean in the ASD groups (Filipe, et al., 2014; Sharda, et al., 2010). The remaining 12 studies report null findings. The meta-analysis included 9 studies for a total of 179 participants with ASD and 178 controls (cf. Figure 1). The overall estimated difference (Cohen's  $d$ ) in mean pitch between the ASD and TD groups was 0.44 (95% CIs: 0.09 0.79,  $p=0.01$ ) with an overall variance ( $\tau^2$ ) of 0.16 (95% CIs: 0.01 0.98). Much of the variance ( $I^2$ : 60.30%, 95% CIs: 11.39 90.10) could not be reduced to random sample variability between studies ( $Q$ -stats = 19.82,  $p = 0.01$ ). However, neither task (estimate: 0.05, 95% CIs -0.75 0.84,  $p=0.91$ ) nor language (estimate: 0.09, 95% CIs -0.02 0.21,  $p=0.12$ ) could significantly explain it.

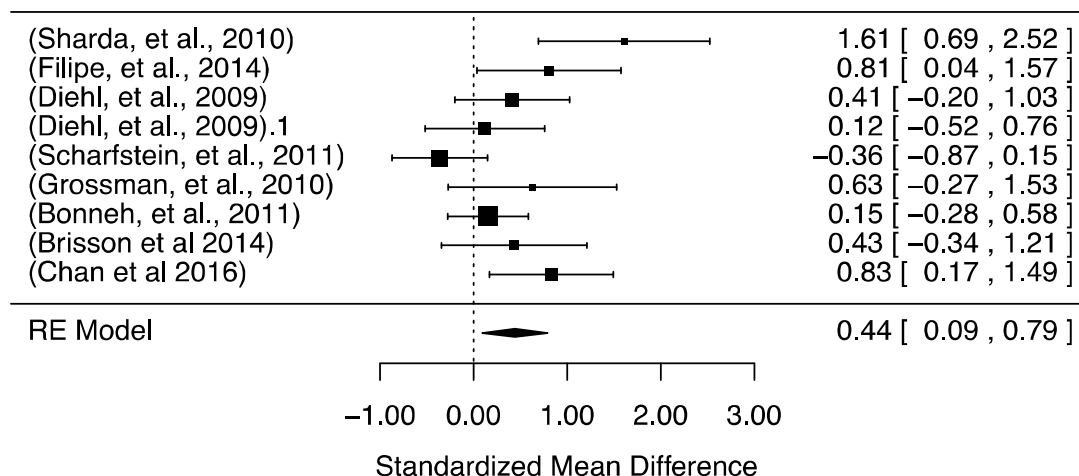

Figure 1 – Forest plot of effect sizes (Cohen's  $d$ ) in pitch mean between the ASD and control populations. The x-axis reports the effect size and the y-axis the studies for which statistical estimates of pitch mean were provided. The dotted vertical line indicates the null hypothesis (no difference between the populations).

One study (Sharda, et al., 2010) with a large effect size and large standard error significantly drives the overall effect (see the lowest right point in Figure 2). Removing this study yielded a smaller but still significant overall effect size (0.31, 95% CIs 0.02 0.61,  $p=0.04$ ). The data also revealed a likely publication bias (Kendall's  $\tau = 0.56$ ,  $p = 0.04$ ; Figure 2), which resonates with the fact that the 5 studies for which estimates were not available all reported non-significant differences. This supports the hypothesis of a bias and a likely overestimation of the overall effect size in the meta-analysis.

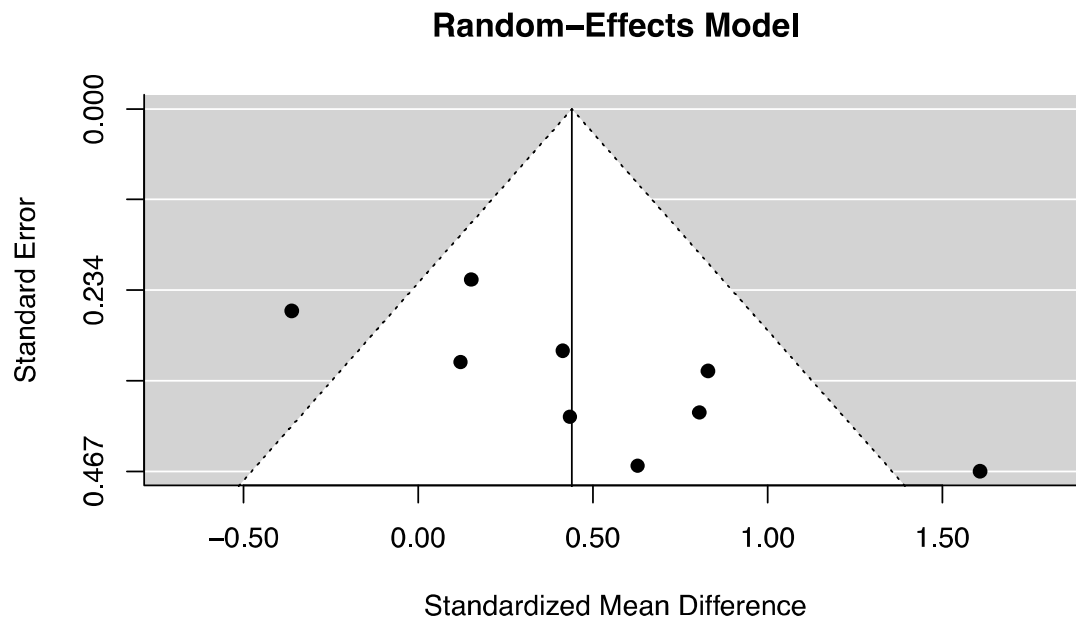

Figure 2 – Funnel plot of publication bias for studies investigating pitch mean. The x-axis reports the effect size (Cohen's  $d$ ) of the difference in pitch mean between ASD and control populations. The y-axis reports the standard error in each study. The white triangle represents an estimation of the real effect size distribution. The publication



bias can be observed in the studies being organized on a diagonal line: higher standard error corresponding to bigger effect size.

*Pitch variability* was investigated in 19 studies involving 310 participants with ASD and 298 controls. 11 studies reported significant results, 10 indicating wider, one narrower and seven no significant differences in pitch variability.<sup>3</sup> As all studies but one used pitch range, rarely adding measures of standard deviation and coefficient of variation, we performed the meta-analysis on pitch range only.

The meta-analysis involved 11 studies, 211 participants with ASD and 217 controls (cf. Figure 3). The overall estimated difference (Cohen's *d*) in pitch variability between the ASD and the control groups was 0.4 (95% CIs: 0.03 0.77, *p*=0.03) with an overall variance ( $\tau^2$ ) of 0.26 (95% CIs: 0.07 1.13). Much of the variance ( $I^2$ : 69.69%, 95% CIs: 36.32 90.87) could not be reduced to random sample variability between studies (*Q*-stats = 31.90, *p* = 0.0004). However, neither task (estimate: 0.3, 95% CIs -0.28 0.88, *p*=0.31) nor language (estimate: -0.001, 95% CIs -0.17 0.17, *p*=0.99) could significantly explain the variance.

---

<sup>3</sup> It should be noted that a few studies attempted to separate different groups within the autism spectrum. One study did not find any significant difference between Asperger Syndrome (AS), high-functioning and pervasive developmental disorder not otherwise specified (PDD-NOS) (Paul, Bianchi, Augustyn, Klin, & Volkmar, 2008). However, another found that individuals with AS produced larger pitch ranges than speakers with PDD-NOS (Kaland, et al., 2012), a pattern repeated when comparing high- with lower-functioning people with autism (Depape, et al., 2012).

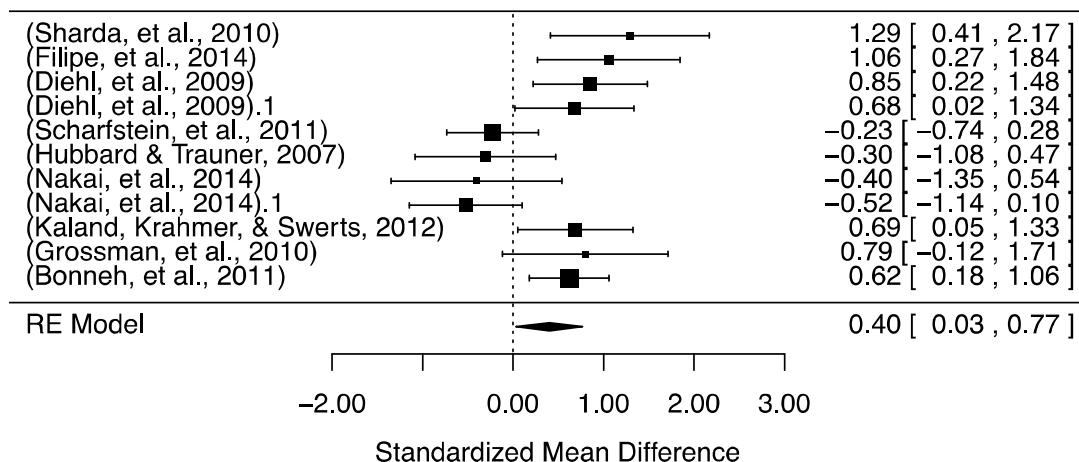

Figure 3 – Forest plot of effect sizes (Cohen's d) in pitch range between the ASD and control populations. The x-axis reports the effect size and the y-axis the studies for which statistical estimates of pitch mean were provided. The dotted vertical line indicates the null hypothesis (no difference between the populations).

There were no obvious outliers, nor any obvious publication bias (Kendall's  $\tau = 0.09$ ,  $p = 0.76$ ; Figure 4). Indeed, of the 7 studies where statistical estimates were not available, 3 reported null findings and 4 included cases in which participants with ASD presented a wider pitch range, slightly reinforcing the hypothesis of a positive effect size.

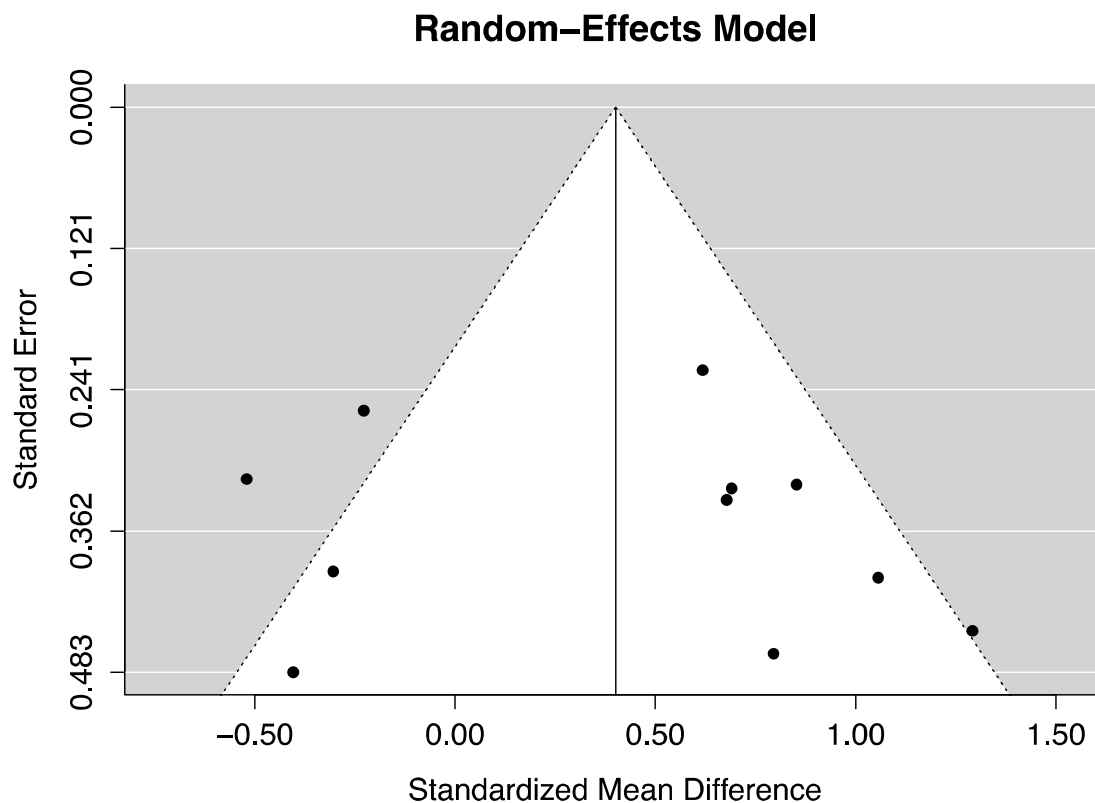

Figure 4 – Funnel plot of publication bias for studies investigating pitch range.

The x-axis reports the effect size (Cohen's  $d$ ) of the difference in pitch mean between ASD and control populations. The y-axis reports the standard error in each study. The white triangle represents an estimation of the real effect size distribution.

*Pitch and severity of clinical features* were investigated in 5 studies (Table 2), which sought to relate quantitative measures of pitch measures to severity of clinical features as measured by the Autism Diagnostic Observation Schedule (ADOS, Lord, 2008) and the Autism Screening Questionnaire (ASQ, Dairoku, Senju, Hayashi, Tojo, & Ichikawa, 2004). Total ADOS scores were negatively related to the temporal trajectory of pitch. In particular, the steeper the slope of pitch change at the end of participants' speech

turns, the lower the ADOS score (Bone, et al., 2014). However, null findings were reported in relation to pitch mean and range (Nadig & Shaw, 2012), and other temporal properties of pitch (Bone, et al., 2014). The communication sub-scale of the ADOS was found to correlate with pitch standard deviation in adolescents but not in children during narrative productions (Diehl, et al., 2009). Finally, pitch coefficient of variation was found to correlate negatively with ASQ Social Reciprocal Interaction, but not with total ASQ, Repetitive Behavior and Communication (Nakai, et al., 2014). As the direction of relation between pitch variability and clinical features seems to vary by study and no replication is available, the current evidence is deemed inconclusive.

*Table 2 – Relations between acoustic measures and severity of clinical features*

| Authors               | Sample Size | Age    | Clinical Features                 | Findings                                                    |
|-----------------------|-------------|--------|-----------------------------------|-------------------------------------------------------------|
| (Diehl, et al., 2009) | 21 ASD      | 10-18y | ADOS Communication                | Pitch SD: Positive correlation                              |
|                       | 21 TD       |        |                                   | $r = 0.43, p < 0.05$                                        |
| (Diehl, et al., 2009) | 17 ASD      | 6-14y  | ADOS Communication                | Pitch SD: NS                                                |
|                       | 17 TD       |        |                                   | $r = 0.06, p = 0.83$                                        |
| (Nadig & Shaw, 2012)  | 15 ASD      | 8-14y  | ADOS total                        | Pitch Range: NS                                             |
|                       | 13 TD       |        |                                   | $r = -0.40, p = 0.14$                                       |
| (Nakai, et al., 2014) | 26 ASD      | 4-10y  | ASQ total                         | Pitch CV (words): NS                                        |
|                       | 37 TD       |        |                                   | $r=0.12, p>0.05$                                            |
|                       |             |        | ASQ Social Reciprocal Interaction | Pitch CV (words): Negative correlation<br>$r=-0.62, p<0.05$ |

|                         |        |       |            |                                  |
|-------------------------|--------|-------|------------|----------------------------------|
| ASQ Repetitive Behavior |        |       |            | Pitch CV (words): NS             |
|                         |        |       |            | $r=0.28, p>0.05$                 |
| ASQ Communication       |        |       |            | Pitch CV (words): NS             |
|                         |        |       |            | $r=0.29, p>0.05$                 |
| (Bone, et al., 2014)    | 24 ASD | 5-14y | ADOS total | Median pitch slope: Negative     |
|                         |        |       |            | $r = -0.68, p < 0.001$           |
|                         |        |       |            | Curvature Pitch Median: Negative |
|                         |        |       |            | $r = -0.53, p < 0.05$            |

While anecdotal and qualitative reports clearly indicate a difference in the use of pitch in ASD, the acoustic evidence is more uncertain, with little replication, and a high number of non-significant or contradictory findings. Even taking at face value the two meta-analytic effect sizes, it should be noted that an estimated difference of Cohen's  $d$  0.4 is a small difference. Indeed, if we were to use these statistical estimates to guess whether any given voice belongs to a participant with ASD or to a control, we would only be right about 61% of the time, an inadequate performance for a potential biomarker (Ellis, 2010).

### 3.2 Intensity

Intensity or loudness is a measure of the energy carried by a sound wave and is important for making speech intelligible and for expressing emotions. 6 studies have investigated intensity through quantitative measures (Table 3).

*Table 3 – Studies involving acoustic measures of intensity in ASD*

| Authors                     | Sample Size   | Age    | Task                                          | Findings                                                                                                                          |
|-----------------------------|---------------|--------|-----------------------------------------------|-----------------------------------------------------------------------------------------------------------------------------------|
| (Scharfstein, et al., 2011) | 30 ASD, 30 TD | 7-13 y | Social Interaction                            | Intensity Mean: Lower<br>ASD: 47.41 db (3.8); TD: 59.03 db (5.9)<br>Intensity SD: Lower<br>ASD: 2.97 db (1.9); TD: 5.15 db (2.0)  |
| (Filipe, et al., 2014)      | 12 ASD, 17 TD | 4-6 y  | Spontaneous production (lexical elicitation)  | Intensity Mean: NS<br>ASD: 75 db (2.88); TD: 72.82 db (4.33)                                                                      |
| (Grossman, et al., 2010)    | 11 ASD, 9 TD  | 7-17 y | Spontaneous production (lexical elicitation)  | Intensity Mean: NS<br>ASD: 68.78 db (4.5); TD: 69.27 db (3.52)<br>Intensity Range: NS<br>ASD: 27.22 db (4.2), TD: 23.82 db (4.39) |
| (Diehl & Paul, 2012)        | 24 ASD, 22 TD | 8-16 y | Constrained production (Imitation)            | Intensity Mean: NS                                                                                                                |
| (Diehl & Paul, 2013)        | 24 ASD, 22 TD | 8-16 y | Spontaneous production (sentence elicitation) | Intensity Mean: NS                                                                                                                |
| (Hubbard & Trauner, 2007)   | 18 ASD, 10 TD | 6-21 y | Constrained production (imitation)            | Intensity Mean: NS                                                                                                                |

*Intensity Mean* was available for 3 studies (63 ASD and 56 control participants), one with significantly lower intensity for ASD and the others with null findings (Filipe, et al., 2014; Grossman, et al., 2010; Scharfstein, et al., 2011).

*Intensity variability* was available for 2 studies involving 41 ASD and 39 control participants. One study reported lower variability, and the other null findings.

Finally, one study attempted to relate intensity measures and severity of clinical features (ADOS total score): No significant correlation was found for ADOS and the temporal profiles of intensity, such as slope and curvature (Bone, et al., 2014).

In summary, there is not enough acoustic evidence to support the impression of atypical voice intensity in ASD.

### 3.3. Duration, speech rate and pauses

Duration is measured as length in seconds, and has been applied to full utterances, lexical items (words) and syllables (often distinguishing between stressed and unstressed syllables), speech rate, measured as estimated syllables per second, number of pauses, length of pauses and voiced duration. 16 studies employed acoustic descriptors of duration (Table 4).

*Table 4 – Studies involving quantitative acoustic measures of duration in ASD*

| Authors                 | Sample Size      | Age     | Task               | Findings                                                         |
|-------------------------|------------------|---------|--------------------|------------------------------------------------------------------|
| (Brisson, et al., 2014) | 13 ASD<br>13 TD  | 0-6 m   | Social Interaction | Vocalization duration: NS<br>ASD: 651 ms (185); TD: 652 ms (262) |
| (Oller, et al., 2010)   | 77 ASD<br>106 TD | 16-48 m | Social Interaction | Vocalization duration:<br>shorter                                |
| (Nadig & Shaw, 2012)    | 15 ASD<br>13 TD; | 8-14 y  | Social Interaction | Speech rate: NS<br>ASD: 172 syll/m; TD: 148                      |

|                             |                 |               |                                                      |                                                                                                                                                               |
|-----------------------------|-----------------|---------------|------------------------------------------------------|---------------------------------------------------------------------------------------------------------------------------------------------------------------|
|                             |                 |               |                                                      | syll/m                                                                                                                                                        |
| (Nadig & Shaw,<br>2012)     | 15 ASD<br>11 TD | 8-14 y        | Spontaneous<br>Production<br>(sentence elicitation)  | Speech rate: NS<br>ASD: 207 syll/m; TD: 204<br>syll/m                                                                                                         |
| (Diehl & Paul,<br>2012)     | 24 ASD<br>22 TD | 8-16<br>years | Constrained<br>Production<br>(Imitation)             | Utterance Duration:<br>Lexical Imitation: Longer<br>Prosodic Imitation: NS                                                                                    |
| (Diehl & Paul,<br>2013)     | 24 ASD<br>22 TD | 8-16<br>years | Spontaneous<br>Production<br>(sentence elicitation)  | Utterance duration: Longer                                                                                                                                    |
| (Depape, et al.,<br>2012)   | 12 ASD<br>6 TD  | 17-34 y       | Social Interaction                                   | Utterance duration: NS                                                                                                                                        |
| (Bonneh, et al.,<br>2011)   | 41 ASD<br>42 TD | 4-6 y         | Spontaneous<br>production (lexical<br>elicitation)   | Utterance duration: longer<br>ASD: 70 s; TD 66 s<br>Word Duration: longer<br>ASD: 0.74 s; TD: 0.62 s<br>Speech Rate: slower<br>ASD: 27.9 wpm; TD: 31.7<br>wpm |
| (Filipe, et al.,<br>2014)   | 12 ASD<br>17 TD | 4-6 y         | Spontaneous<br>production (lexical<br>elicitation)   | Utterance duration: longer<br>ASD: 1.08 (0.15); TD: 0.89<br>(0.5)                                                                                             |
| (Fosnot & Jun,<br>1999)     | 4 ASD<br>4 TD   | 7-14 y        | Constrained<br>production (reading<br>and imitation) | Utterance duration: longer                                                                                                                                    |
| (Grossman, et al.,<br>2010) | 16 ASD<br>15 TD | 7-17 y        | Spontaneous<br>production (lexical<br>elicitation)   | Syllable Duration: longer<br>First syllable stress: ASD<br>0.82 (0.15), TD: 0.68 (0.19)                                                                       |



|                                                             |                  |         |                                                        |                                                                                                                                                             |
|-------------------------------------------------------------|------------------|---------|--------------------------------------------------------|-------------------------------------------------------------------------------------------------------------------------------------------------------------|
|                                                             |                  |         |                                                        | Last syllable stress: ASD<br>0.98 (0.19), TD: 0.83 (0.21)<br>Speech rate: NS<br>ASD: 5.31 (1.31); TD: 5.44<br>(1.54)                                        |
| (Paul, et al.,<br>2008)                                     | 46 ASD,<br>20 TD | 7-28 y  | Constrained<br>production<br>(imitation)               | (stressed) syllable duration:<br>shorter<br>ASD: 321 (45) ms; TD: 346<br>(44)<br>(unstressed) syllable<br>duration: NS<br>ASD: 196 (35) ms; TD: 186<br>(23) |
| (Hubbard &<br>Trauner, 2007)                                | 18 ASD<br>10 TD  | 6-21 y  | Constrained<br>production<br>(Imitation)               | Utterance Duration: NS                                                                                                                                      |
| (Thurber &<br>Tager-Flusberg,<br>1993)                      | 10 ASD<br>10 TD  | 7-15 y  | Spontaneous<br>production<br>(narrative<br>production) | Grammatical pauses: NS<br>ASD: 13.1 (7.4); TD: 9.1<br>(3.7)<br>Agrammatical pauses: Fewer<br>ASD: 2.7 (2); TD: 4.3 (2.2)                                    |
| (Feldstein,<br>Konstantareas,<br>Oxman, &<br>Webster, 1982) | 12 ASD,<br>24 TD | 14-20 y | Social Interaction                                     | Pauses: Longer<br>Stronger effect when<br>speaking with unfamiliar<br>interlocutor<br>Vocalization duration: NS                                             |
| (Morett,<br>O'Hearn, Luna,                                  | 18 ASD,<br>21 TD | 10-20y  | Spontaneous<br>production                              | Utterance duration: NS<br>ASD: 17.52 s (9.22); TD:                                                                                                          |

|                                |             |                              |
|--------------------------------|-------------|------------------------------|
| <b>&amp; Ghuman,<br/>2015)</b> | (narrative  | 26.92 (13.33)                |
|                                | production) | Pause Number: Higher         |
|                                |             | ASD: 2.81 s (1.86); TD: 1.11 |
|                                |             | (1.18)                       |

Out of 12 studies involving duration measures 6 reported longer duration, 4 reported no differences between groups and 1 shorter duration in ASD. Out of 4 studies investigating speech rate, 3 reported null findings and 1 found slower speech rate in ASD. Out of 2 studies focusing on syllable duration with, one reports longer duration for stressed syllables in ASD, whereas the other reports shorter duration for stressed syllables and no differences for unstressed syllables. Out of 3 studies measuring speech pauses, one finds longer pauses, one no difference in grammatically motivated pauses, but fewer pragmatically motivated ones and the third a higher number of pauses. 2 studies investigated the relation between speech rate and severity of clinical features in terms of ADOS total scores), but found no significant correlations (Bone, et al., 2014; Nadig & Shaw, 2012). In sum, not enough statistical estimates were reported to allow for meta-analyses and the findings do not seem conclusive.

### 3.4. Voice Quality

Voice quality covers a large variety of features, which do not overlap between studies. Hoarseness, breathiness and creaky voice are often attributed to imperfect control of the vocal fold vibrations that produce speech and have been quantified as irregularities in pitch (jitter) and intensity (shimmer), or as low harmonic to noise ratio (relation between periodic and aperiodic sound waves) (Tsanas, Little, McSharry, & Ramig, 2011). More

generic definitions of dysphonia, or voice perturbation, rely on cepstral analyses, which involve a further frequency decomposition of the pitch signal, that is, the frequency of changes in frequency (Maryn, Roy, De Bodt, Van Cauwenberge, & Corthals, 2009). Analyses of voice quality are particularly challenging and difficult to compare across studies because of a lack of established standards: they rely on the choice of several parameters, and the results change greatly if applied to prolonged phonations (held vowels), or continuous speech (Laver, Hiller, & Beck, 1992; Orlikoff & Kahane, 1991).

So far only one published study has investigated acoustic measures of voice quality in ASD: children with ASD were shown to have more jitter and jitter variability, as well as less harmonic to noise ratio, and no differences in shimmer or cepstral peak prominence (Bone, et al., 2014). However, a series of unpublished conference papers (reported in Shriberg, et al., 2001) point to breathiness (Boucher, Andrianopoulos, & Velleman, 2010; Wallace et al., 2008), tremors (Wallace, et al., 2008), and task- and vowel-dependent low jitter and low shimmer (Boucher, Andrianopoulos, Velleman, & Pecora, 2009).

One study investigated the relation between ADOS total scores and voice quality, highlighting positive correlations with jitter and harmonics to noise ratio variability, and negative ones with levels of Harmonic to Noise Ratio (Bone, et al., 2014). Notice that since the only published study mentioned here is already fully reported in previous tables, we have not produced a dedicated table for studies on voice quality.

In summary, while a distinctive voice quality has been reported in ASD since the very early days of the diagnosis, quantitative evidence is extremely sparse. While

potentially promising, the existing studies use non-overlapping measures, making it difficult to assess the generality of the patterns observed.

#### **4. Results: From Acoustic Patterns to Diagnosis (multivariate machine learning studies)**

The previous section reviewed studies identifying differences in acoustic patterns produced by ASD and control samples, one feature at a time. In this section we review a second set of 15 studies (cf. Table 5), which present an alternative approach: multivariate machine learning (Bishop, 2006; Hastie, Tibshirani, & Friedman, 2009). Briefly, multivariate machine learning differs from traditional univariate approaches in three respects. First, the research question is reversed. Univariate approaches ask whether there is a statistically significant difference between two distinct populations (independent variable) with respect to some measure (dependent variable). Machine learning approaches seek to determine whether the data contains enough information to accurately separate the two populations. Second, a multivariate approach enters multiple data features simultaneously into the analysis, including a wider variety of features than normally treated in their simple univariate form (such as more detailed spectral and cepstral features). Third, the goal is not to identify the statistical model that best separates the populations from which the data has been obtained, but to identify the model that best generalizes to new data (e.g., generalize from a training to a test set of data).

Multivariate machine learning studies typically involve processes of (1) feature extraction and (2) classification (e.g., presence of diagnosis) or score prediction (e.g., severity of clinical features). The first process involves extraction of acoustic features

from vocal recordings. While most studies use summary statistics discussed earlier section (mean and standard deviation of acoustic features), they often include additional measures, such as non-linear descriptive statistics. Traditional summary statistics cannot adequately capture the non-stationary nature of the speech signal; for example, the mean and the standard deviation of pitch often change over a speech event (Jiang, Zhang, & McGilligan, 2006). In contrast, time-aware measures – such as slope analysis, recurrence quantification analysis, Teager-Kaiser energy operator and fractal analyses - quantify the degree to which acoustic patterns change or are repeated in time (cf. Table 5. For detailed and technical descriptions of these methods, cf. Bone, et al., 2014; Kiss, van Santen, Prud'hommeaux, & Black, 2012; Marwan, Carmen Romano, Thiel, & Kurths, 2007; Riley, Bonnette, Kuznetsov, Wallot, & Gao, 2012; Tsanas, et al., 2011; Weed & Fusaroli, submitted). Finally, most studies expand the range of measures, by further quantifying formants, spectral and cepstral properties of the speech signal (cf. Table 5, for a more detailed treatment of these measures cf. the referred papers and Eadie & Doyle, 2005)

The second process comprises the construction of a statistical model that maximally distinguishes the target groups of interest (for detailed introductions to these topics, cf. Bishop, 2006; Hastie, et al., 2009). The division of the data into training and test sets and cross-validation procedures help ensure that the model is not specific to a given sample but can generalize to the whole population (for details, cf. Rodriguez, Perez, & Lozano, 2010).

Table 5 – Reconstructing Diagnosis from Voice Patterns. An overview

| Authors               | Sample Size                  | Age        | Features                                                                                                                                                                                                                                                                                                                                                                                                                                | Classifier & Performance <sup>4</sup>                                                                                     |
|-----------------------|------------------------------|------------|-----------------------------------------------------------------------------------------------------------------------------------------------------------------------------------------------------------------------------------------------------------------------------------------------------------------------------------------------------------------------------------------------------------------------------------------|---------------------------------------------------------------------------------------------------------------------------|
| (Santos et al., 2013) | 23 ASD<br>20 TD              | 18 m       | Mean, SD and range of:<br>pitch; first four formant<br>frequencies and<br>bandwidths; harmonic<br>spectra locations and<br>magnitudes and the<br>differences between<br>spectral harmonic<br>magnitudes and<br>spectrum magnitude at<br>the formant frequencies;<br>subharmonic-to-<br>harmonic ratio (SHR);<br>intensity; cepstral peak<br>prominence (CPP);<br>harmonic-to-noise ratio<br>(HNR); jitter and<br>shimmer; voiced ratio. | 10-fold cross-validated<br>probabilistic NN.<br>Accuracy: 83%-97%<br>10-fold cross-validated<br>SVM.<br>Accuracy: 79%-63% |
| (Oller, et al., 2010) | 77 ASD<br>106 TD<br>(46 SLI) | 16-48<br>m | Voicing events,<br>canonical syllables, and<br>moderately high spectral                                                                                                                                                                                                                                                                                                                                                                 | Leave-one-out cross-<br>validated linear DA.<br>Accuracy: 86%                                                             |

<sup>4</sup> NN: neural networks; SVM: support vector machines; k-NN: nearest neighbors; DA: discriminant analysis. *Accuracy* indicates the percentage of correctly identified data points in the testing set. *Specificity* indicates the ability to correctly identify controls as controls, *Sensitivity* or recall indicates the ability to correctly identify targets as targets. *Precision* indicates the probability that a positive diagnosis does indeed entail the presence of a disorder. For regressions, performance is measured in terms of variance explained,  $R^2$ , which in turn tends to be penalized according to the number of features included, Adjusted  $R^2$  (Hastie, et al., 2009) .

|                                                                |                                                                 |         |                                                                                                                                                                   |                                                                                                  |
|----------------------------------------------------------------|-----------------------------------------------------------------|---------|-------------------------------------------------------------------------------------------------------------------------------------------------------------------|--------------------------------------------------------------------------------------------------|
| Interaction                                                    |                                                                 |         | entropy; low spectral tilt<br>and high pitch control<br>group; wide formant<br>bandwidth and low<br>pitch control; duration                                       |                                                                                                  |
| <b>(Bonneh, et al., 2011)</b>                                  | 41 ASD<br>42 TD<br>Spontaneous<br>production                    | 4-6.5 y | Pitch range and<br>variability                                                                                                                                    | DA.<br>Accuracy: 86%<br>Sensitivity: 80%<br>Specificity: 90%                                     |
| <b>(Kiss, et al., 2012)</b>                                    | 14 ASD<br>25 ASD<br>Social<br>Interaction<br>(+SLI)<br>(24 SLI) | 4-9 y   | Pitch mean, median,<br>standard deviation,<br>median absolute<br>deviation, mean<br>absolute deviation,<br>interquartile range<br>(IQR), skewness and<br>kurtosis | Leave-one-out cross-<br>validated Naive Bayes.<br>Accuracy: 74%<br>Precision: 57%<br>Recall: 86% |
| <b>(Kakihara, Takiguchi, Ariki, Nakai, &amp; Takada, 2015)</b> | 30 ASD<br>54 TD<br>Spontaneous<br>production                    | 4-9 y   | Pitch and first derivative<br>of pitch percentiles,<br>mean, standard<br>deviation, kurtosis,<br>skewness, maximum,<br>minimum, and range                         | 10-fold cross-validated<br>SVM.<br>Accuracy: 74.9% (against a<br>baseline accuracy of 73.2%)     |
| <b>(Asgari, Bayestehtas hk, &amp;</b>                          | 12 ASD<br>64 TD<br>13 SLI                                       | 9-18 y  | Pitch, shimmer, jitter,<br>HNR; energy, cepstral<br>and spectral features                                                                                         | Test/Train SVM 93.80%                                                                            |

|                    |         |        |                          |                                       |
|--------------------|---------|--------|--------------------------|---------------------------------------|
| <b>Shafran,</b>    | 10 PDD- |        |                          |                                       |
| <b>2013)</b>       | NOS     |        |                          |                                       |
| Constrained        |         |        |                          |                                       |
| production         |         |        |                          |                                       |
| <b>(Bone, et</b>   | 12 ASD  | 9-18y  | Mel cepstral             | (i) linear-kernel SVMs;               |
| <b>al., 2013)</b>  | 64 TD   |        | coefficients; pitch,     | (ii) deep neural networks;            |
| Constrained        | 13 SLI  |        | intensity, duration;     | and (iii) k-NN classification         |
| production         | 10 PDD- |        | pronunciation quality;   | 60.2% Unweighted Average              |
|                    | NOS     |        | total signal; energy,    | Recall                                |
|                    |         |        | mean and relative        |                                       |
|                    |         |        | energy changes over      |                                       |
|                    |         |        | multiple time scales and |                                       |
|                    |         |        | frequency bands, and     |                                       |
|                    |         |        | the frequencies with the |                                       |
|                    |         |        | majority of energy       |                                       |
|                    |         |        | content                  |                                       |
| <b>(Fusaroli,</b>  | 10 ASD  | 20-40y | Parametric (mean, sd)    | ElasticNet +                          |
| <b>Bang, &amp;</b> | 13 TD   |        | and dynamic              | 5-fold cross-validated                |
| <b>Weed,</b>       |         |        | (recurrence measures)    | discriminant function: 86%            |
| <b>2013)</b>       |         |        | measures of pitch, and   | accuracy, 88.4% sensitivity           |
| Spontaneous        |         |        | duration.                | and 85.4% specificity.                |
| production         |         |        |                          |                                       |
|                    |         |        |                          | ElasticNet +                          |
|                    |         |        |                          | 5-fold cross-validated linear         |
|                    |         |        |                          | regression predicts Autism            |
|                    |         |        |                          | Spectrum Quotient: Adj R <sup>2</sup> |
|                    |         |        |                          | 0.8, p=0.006.                         |
| <b>(Fusaroli,</b>  | 78 ASD  | 8-16y  | Parametric (mean, sd)    | ElasticNet +                          |



|                    |           |        |                            |                                   |
|--------------------|-----------|--------|----------------------------|-----------------------------------|
| <b>Grossman,</b>   | (52 US;   |        | and dynamic                | 5-fold cross-validated            |
| <b>Cantio,</b>     | 26 DK)    |        | (recurrence measures,      | discriminant function:            |
| <b>Bilenberg,</b>  | 68 TD (34 |        | teager-keisar energy       | Accuracy: 71.65 %                 |
| <b>&amp; Weed,</b> | US; 34    |        | operator) measures of      | (American English data,           |
| <b>2015)</b>       | DK)       |        | pitch, intensity, duration | US); 82.01 % (Danish data,        |
| Spontaneous        |           |        | and voice quality.         | DK); 71.9% (combined)             |
| production         |           |        |                            | Sensitivity: 59.32% (US);         |
|                    |           |        |                            | 84.80% (DK); 63.22%               |
|                    |           |        |                            | (combined)                        |
|                    |           |        |                            | Specificity: 84.42% (US);         |
|                    |           |        |                            | 81.39% (DK); 80.01%               |
|                    |           |        |                            | (combined)                        |
|                    |           |        |                            | ElasticNet +                      |
|                    |           |        |                            | 5-fold cross-validated linear     |
|                    |           |        |                            | regression:                       |
|                    |           |        |                            | ADOS RSI: Adj R <sup>2</sup> 0.28 |
|                    |           |        |                            | (US); NS (DK); 0.13               |
|                    |           |        |                            | (combined)                        |
|                    |           |        |                            | ADOS SB: Adj R <sup>2</sup> 0.46  |
|                    |           |        |                            | (US); 0.32 (combined)             |
| <b>(Fusaroli,</b>  | 17 ASD    | 25-62y | Parametric (mean, sd)      | ElasticNet +                      |
| <b>Lambrecht</b>   | 17 TD     |        | and dynamic                | 5-fold cross-validated            |
| <b>s, et al.,</b>  |           |        | (recurrence measures,      | discriminant function:            |
| <b>2015)</b>       |           |        | teager-keisar energy       | Accuracy: 81.09%                  |
| Spontaneous        |           |        | operator) measures of      | Sensitivity: 84.83%               |
| production         |           |        | pitch, intensity, duration | Specificity: 82.20%               |
|                    |           |        | and voice quality.         |                                   |

|                              |               |       |                                                                                                                                                                                                                                            |                                                                            |
|------------------------------|---------------|-------|--------------------------------------------------------------------------------------------------------------------------------------------------------------------------------------------------------------------------------------------|----------------------------------------------------------------------------|
|                              |               |       |                                                                                                                                                                                                                                            | ElasticNet +                                                               |
|                              |               |       |                                                                                                                                                                                                                                            | 5-fold cross-validated linear                                              |
|                              |               |       |                                                                                                                                                                                                                                            | regression:                                                                |
|                              |               |       |                                                                                                                                                                                                                                            | ADOS total: Adj R <sup>2</sup> : 0.54                                      |
|                              |               |       |                                                                                                                                                                                                                                            | ADOS RSI: Adj R <sup>2</sup> : 0.52                                        |
| <b>(Bone, et al., 2014)</b>  | 24 ASD        | 5-14y | Non parametric descriptive statistics (IQR and median) of: curvature, slope and center of pitch and intensity over time; Boundary and non boundary changes of speech rate of time. Voice Quality: Jitter, Shimmer, CPP, HNR median and IQR | Stepwise regression: Spearman rank order correlation with ADOS total: 0.64 |
| <b>(Marchi et al., 2015)</b> | 8 ASD<br>9 TD | 5-11y | Energy, spectral, cepstral (MFCC) and voicing related low-level descriptors (LLD) as well as logarithmic harmonic-to-noise ratio (HNR), spectral harmonicity, and psychoacoustic spectral sharpness                                        | Leave-One-Out cross-validated SVM<br>Sensitivity 78.3%                     |
| <b>(Marchi, et</b>           | 9 ASD         | 5-11y | Energy, spectral,                                                                                                                                                                                                                          | Leave-One-Out cross-                                                       |

|                    |       |       |                         |                      |
|--------------------|-------|-------|-------------------------|----------------------|
| <b>al., 2015)</b>  | 11 TD |       | cepstral (MFCC) and     | validated SVM        |
| Spontaneous        |       |       | voicing related low-    | Sensitivity 86.4%    |
| Production         |       |       | level descriptors (LLD) |                      |
|                    |       |       | as well as logarithmic  |                      |
|                    |       |       | harmonic-to-noise ratio |                      |
|                    |       |       | (HNR), spectral         |                      |
|                    |       |       | harmonicity, and psy-   |                      |
|                    |       |       | choacoustic spectral    |                      |
|                    |       |       | sharpness               |                      |
| <b>(Marchi, et</b> | 7 ASD | 5-10y | Energy, spectral,       | Leave-One-Out cross- |
| <b>al., 2015)</b>  | 11 TD |       | cepstral (MFCC) and     | validated SVM        |
| Spontaneous        |       |       | voicing related low-    | Sensitivity 82.7%    |
| Production         |       |       | level descriptors (LLD) |                      |
|                    |       |       | as well as logarithmic  |                      |
|                    |       |       | harmonic-to-noise ratio |                      |
|                    |       |       | (HNR), spectral         |                      |
|                    |       |       | harmonicity, and psy-   |                      |
|                    |       |       | choacoustic spectral    |                      |
|                    |       |       | sharpness               |                      |

An overview of the sensitivities and specificities of the algorithms, when it was possible to reconstruct them and their uncertainty, is presented in Figures 5 and 6.

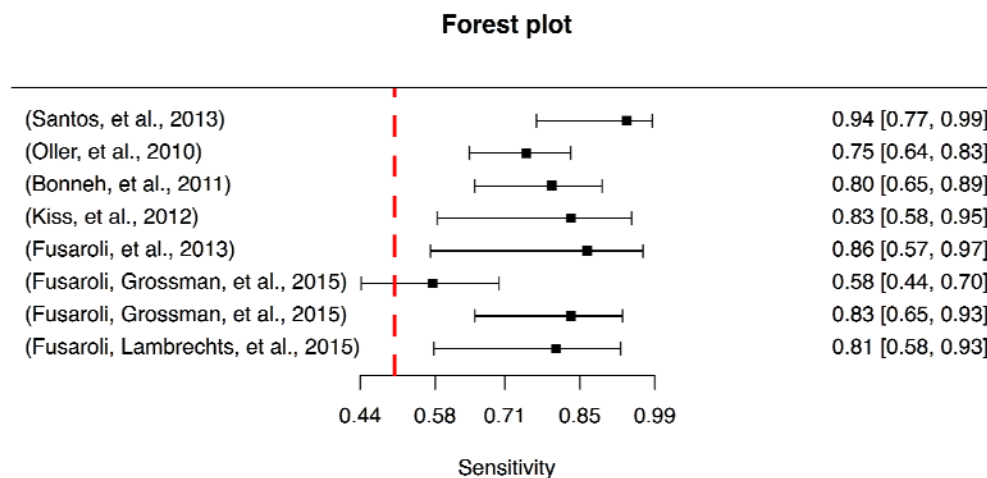

Figure 5 - Forest plot of the algorithms' sensitivities in automatically discriminating between the ASD and control populations. The x-axis reports the sensitivity and the y-axis the studies for which it was possible to reconstruct the confidence intervals of sensitivity. The dotted line indicates sensitivity at chance level, that is, 50%.

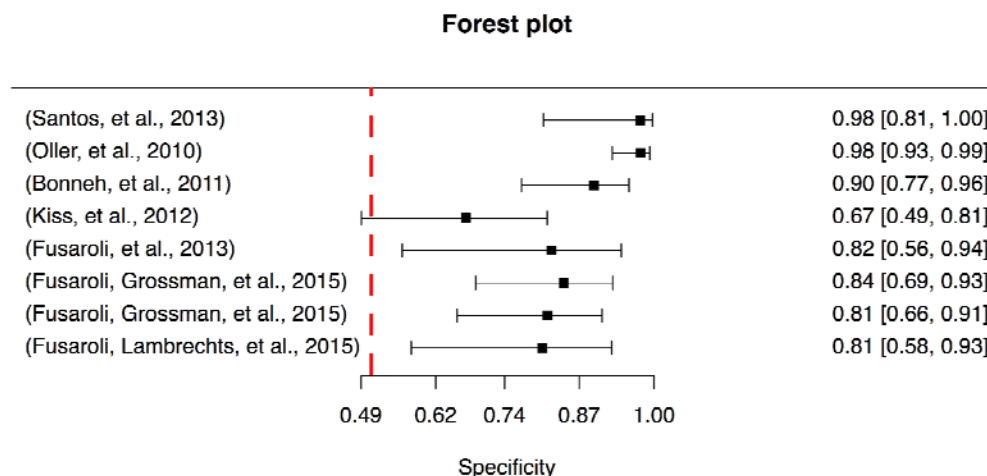

Figure 6 - Forest plot of the algorithms' specificities in automatically discriminating between the ASD and control populations. The x-axis reports the

sensitivity and the y-axis the studies for which the relevant statistics were available. The dotted line indicates specificity at chance level, that is, 50%.

All but one multivariate machine-learning study reported accuracies well above 70% and up to 96%<sup>5</sup>. Besides the classification of voice into ASD and control groups, 4 studies demonstrate the possibility to predict severity of clinical features (ADOS total scores, ADOS Stereotyped Behavior and ADOS Reciprocal Social Interaction) from acoustic measures, in particular pitch, shimmer and jitter (Bone, et al., 2014; Fusaroli, et al., 2013; Fusaroli, Grossman, et al., 2015; Fusaroli, Lambrechts, et al., 2015). However, differences in terms of methods and measures again make comparison between studies difficult.

## 6. Discussion

### 6.1 Overview

Clinical practitioners have long attributed distinctive voice and prosodic patterns to individuals with ASD (Asperger, 1944; Kanner, 1943). We set out to systematically review the evidence for such patterns. We identified 32 articles involving 27 univariate and 15 multivariate machine-learning studies. Sample sizes were limited, with a mean of 20.3 (SD: 14.63) and a median of 17.5 (IQR: 8.25) ASD participants across the univariate studies and a mean of 24.1 (SD: 18.24) and a median of 17 (IQR: 15.5) across the multivariate ones. We found as many null results as significant differences between ASD

---

<sup>5</sup> Given the heterogeneity of the studies in terms of acoustic measures and algorithms a meta-analysis would not be reliable and is not reported. The curious reader can find the code for performing one at <https://github.com/fusaroli/AcousticPatternsInASD>

and control groups. Meta-analyses identified significant, but small effects for pitch mean and range.

The multivariate machine-learning studies by contrast painted a more promising picture and largely outperform the univariate ones, with accuracy ranging from 70% to 96% (against 61% in the univariate studies) for separating individuals with ASD from controls. The multivariate attempts at predicting severity of clinical features do not systematically outperform the univariate studies (univariate  $R^2$  between 0.18 and 0.46; multivariate Adjusted  $R^2$  between 0.13 and 0.8). Whilst the multivariate findings are stronger and involve more robust statistical procedures, there has been no general attempt to replicate findings across multiple studies using similar methods. Because of the complexity of the statistical models involved in the multivariate studies, it is not clear which acoustic features are the most informative for diagnosis across studies.

## 6.2. Obstacles in identifying an acoustic biomarker for ASD

We raised the possibility that acoustic features of vocal production could be used as a biomarker of ASD. However, we could not identify any single feature that yet can serve the role. While many aspects of vocal production in ASD have long been described as different, there have been few consistent findings among studies, except for pitch mean and range. The multivariate machine-learning approach to vocal production in ASD seems promising; it can capture the complex and often non-linear nature of the acoustic patterns that may have given rise to the clinical impression of atypical voice and prosody in

ASD. Indeed, such impressions are often based on multiple types of information (Forbes-Riley & Litman, 2004; Liscombe, Venditti, & Hirschberg, 2003).

Many advances have thus been made since McCann & Peppe's (2003) review: a larger number of acoustic features have been quantitatively defined and more complex statistical techniques have been developed. However, the search for a vocal biomarker of ASD has to overcome four obstacles: small sample sizes; few replications of effects across studies; too heterogeneous methods for the extraction of acoustic features and their analysis; and limited theoretical background for the research. First, people with ASD present diverse clinical features with different levels of severity. Five of the reviewed studies sought to investigate the relation between severity of clinical features and acoustic patterns. However, because the sample size of each study was too low (median of participants with ASD < 30), it is difficult – if not impossible – to control for the large natural heterogeneity among individuals in terms of clinical features and their severity. Second, most of the studies reviewed focused on different acoustic features, which entails that effects rarely are replicated and that it is difficult to perform reliable meta-analyses of effect sizes. Third, the reviewed studies differed considerably with respect to methods and statistical analysis. For example, we identified three types of speech-production task (constrained production, spontaneous production and social interaction), each of which is likely to involve distinct social and cognitive demands and therefore different vocal production patterns, but more fine-grained typologies could be used. Further, different studies do not only use different acoustic features but also use different methods for

feature extraction – if described at all – making comparisons between studies difficult<sup>6</sup>. This lack of clarity is especially problematic for machine-learning techniques<sup>7</sup>.

### 6.3. Towards a more collaborative and open research process

The combination of promising results and a lack of a systematic approach is far from rare in the study of acoustic patterns in neuropsychiatric conditions (Cohen, Mitchell, & Elvevåg, 2014; Cummins, et al., 2015; Weed & Fusaroli, submitted). To develop a systematic approach to vocal production in ASD, which would hold across datasets and be of clinical relevance, we need more open and cumulative research practices. We therefore outline three recommendations for future research: open data, open methods, and theory-driven research.

*Open Data.* Many of the reviewed studies did not report the necessary information for performing meta-analysis. For example, we could not control for age, as we could not access acoustic measures for the individual participants. The field as a whole would benefit from sharing of datasets, which would allow for across-study comparisons and for larger scale analyses. While voice recordings are often sensitive data in clinical population, and therefore not easily shareable, the extracted acoustic measures do not always share this restriction. In line with this recommendation, the data used here are available at <https://github.com/fusaroli/AcousticPatternsInASD>.

---

<sup>6</sup> For instance, the parameters to define the accepted ceiling of the fundamental frequency might vary from 400 Hz to 700 Hz. Higher ceilings have been shown to better capture acoustic differences features in ASD (Kiss, et al., 2012), however the definition of the ceiling employed is very rarely reported.

<sup>7</sup> It has been shown, for example, that recording participants with ASD and controls at different locations (which was unreported) induced artificially high discrimination accuracy due to the properties of each locations' background noise (Bone, et al., 2013).



*Open Methods.* The quantitative assessment of acoustic measures presents the researcher with several important choices: for example, how should the audio signal be preprocessed, which parameters should be used to extract fundamental frequency, and should the extracted data be transformed. As more complex signal-processing techniques are developed, it becomes even more critical to fully describe the methods involved in a given study. Otherwise replication and cross-talk between research groups are impossible. Ideally, the full data-processing pipeline should be automated and the script used to do so should be published as supplementary material (or on public code repositories such as GitHub). The literature on vocal production in Parkinson's and affective disorders might serve as example for researchers investigating vocal production in ASD (Degottex, Kane, Drugman, Raitio, & Scherer, 2014; Tsanas, et al., 2011). In line with this recommendation, the R code employed in this paper is available at <https://github.com/fusaroli/AcousticPatternsInASD>, and can be easily improved and/or used to update the meta-analysis as new studies are published.

*Theory-driven research.* A common feature of the studies reviewed is the lack of theoretical background. For example, limited attention is paid to clinical features and their severity and the choice of the speech-production task and acoustic measures used is often under-motivated. On the contrary, by putting hypothesized mechanisms to the test, more theory-driven research on vocal production in ASD would improve our understanding of the disorder itself. For examples, recent models of impaired perceptual and motor anticipation in ASD (Palmer, Paton, Kirkovski, Enticott, & Hohwy, 2015; Van de Cruys et al., 2014) would predict the presence of jitter and shimmer in vocal production in ASD. Further, models of social impairment in ASD could be tested by

analyzing the acoustic dynamics involved in conversations, such as reciprocal prosodic adaptation and compensation (Dale, Fusaroli, Duran, & Richardson, 2013; Fusaroli, Raczaszek-Leonardi, & Tylén, 2014; Fusaroli & Tylén, 2012; Hopkins, Yuill, & Keller, 2015; Lambrechts, Yarrow, Maras, & Gaigg, 2014; Pickering & Garrod, 2004; Slocombe et al., 2013).

In general, different speech-production tasks involve different social and cognitive demands and such differences might account for much of the unexplained variance between the reviewed studies. We therefore recommend data collection using several motivated speech-production tasks, especially combining existing clinical and ecological speech recordings with tasks chosen based on hypothesized mechanisms underlying clinical features. On one hand, structured tasks might allow the researcher to control for confounds and test for the role of specific experimental factors. Further, several standardized tests – including ADOS interviews – involve vocal production and their systematic collection and use could enable the construction of large datasets comparable across labs and languages. On the other hand, structured tasks might not offer representative samples of vocal productions in ASD, as individuals with ASD differ in terms of what they can do if tested and what they actually do in their everyday life (Fine, Bartolucci, Ginsberg, & Szatmari, 1991; Klin, Jones, Schultz, & Volkmar, 2003). Recent technological developments enable unobtrusive longitudinal recordings, opening up for the study of prosody and other social behaviors during everyday life (Vosoughi, Goodwin, Washabaugh, & Roy, 2012; Warlaumont, et al., 2014). This might in turn help us better understand the everyday dynamics of social impairment in ASD.

## 7. Conclusion

We have systematically reviewed the literature on distinctive acoustic patterns in ASD. We did not find conclusive evidence for a single acoustic biomarker for ASD and predictor for severity of clinical features. Multivariate machine-learning research provides promising results, but more systematic cross-study validations are required. To advance the study of vocal production in ASD, we outlined three recommendations: more open, more cumulative and more theory-driven research.

## 8. References

- Alden, L. E., & Taylor, C. T. (2004). Interpersonal processes in social phobia. *Clinical Psychology Review*, 24(7), 857-882.
- Amorosa, H. (1992). 10. Disorders of vocal signaling in children. *Nonverbal vocal communication: Comparative and developmental approaches*, 192.
- Asgari, M., Bayestehtashk, A., & Shafran, I. (2013). *Robust and accurate features for detecting and diagnosing autism spectrum disorders*. Paper presented at the INTERSPEECH.
- Asperger, H. (1944). Die „Autistischen Psychopathen“ im Kindesalter. *European Archives of Psychiatry and Clinical Neuroscience*, 117(1), 76-136.
- Baltaxe, C. (1981). Acoustic characteristics of prosody in autism. In P. Mittler (Ed.), *Frontier of knowledge in mental retardation*. Baltimore, MD: University Park Press.
- Baltaxe, C. (1984). Use of contrastive stress in normal, aphasic, and autistic children. *Journal of Speech, Language, and Hearing Research*, 27(1), 97-105.
- Baltaxe, C., & Simmons, J. (1985). Prosodic development in normal and autistic children *Communication problems in autism*: Springer.
- Banse, R., & Scherer, K. R. (1996). Acoustic profiles in vocal emotion expression. *Journal of Personality and Social Psychology*, 70, 614-636.
- Bishop, C. M. (2006). *Pattern recognition and machine learning*: springer.
- Bone, D., Chaspari, T., Audhkhasi, K., Gibson, J., Tsiartas, A., Van Segbroeck, M., . . . Narayanan, S. (2013). *Classifying language-related developmental disorders from speech cues: the promise and the potential confounds*. Paper presented at the INTERSPEECH.
- Bone, D., Lee, C.-C., Black, M. P., Williams, M. E., Lee, S., Levitt, P., & Narayanan, S. (2014). The psychologist as an interlocutor in autism spectrum disorder

- assessment: Insights from a study of spontaneous prosody. *Journal of Speech, Language, and Hearing Research*, 57(4), 1162-1177.
- Bonneh, Y. S., Levanon, Y., Dean-Pardo, O., Lossos, L., & Adini, Y. (2011). Abnormal speech spectrum and increased pitch variability in young autistic children. *Frontiers in human neuroscience*, 4, 237.
- Boucher, M. J., Andrianopoulos, M. V., & Velleman, S. L. (2010). *Prosodic features in the spontaneous speech of children with Autism Spectrum Disorders*. Paper presented at the International Child Phonology Conference, Memphis, TN: The University of Memphis. .
- Boucher, M. J., Andrianopoulos, M. V., Velleman, S. L., & Pecora, L. (2009). *Voice characteristics of autism*. Paper presented at the Annual Convention of the American Speech-Language-Hearing Association, New Orleans, LA.
- Brisson, J., Martel, K., Serres, J., Sirois, S., & Adrien, J. L. (2014). Acoustic analysis of oral productions of infants later diagnosed with autism and their mother. *Infant mental health journal*, 35(3), 285-295.
- Bryant, G. A. (2010). Prosodic contrasts in ironic speech. *Discourse Processes*, 47, 545-566.
- Chan, K. K., & To, C. K. (2016). Do Individuals with High-Functioning Autism Who Speak a Tone Language Show Intonation Deficits? *Journal of Autism and Developmental Disorders*, 1-9.
- Cochran, W. G. (1954). The combination of estimates from different experiments. *Biometrics*, 10(1), 101-129.
- Cohen, A. S., Mitchell, K. R., & Elvevåg, B. (2014). What do we really know about blunted vocal affect and alogia? A meta-analysis of objective assessments. *Schizophrenia research*, 159(2), 533-538.
- Cummins, N., Scherer, S., Krajewski, J., Schnieder, S., Epps, J., & Quatieri, T. F. (2015). A review of depression and suicide risk assessment using speech analysis. *Speech Communication*, 71, 10-49.
- Dairoku, H., Senju, A., Hayashi, E., Tojo, Y., & Ichikawa, H. (2004). Development of Japanese version of autism screening questionnaire. *Kokuritsu Tokushu Kyoiku Kenkyusho Ippan Kenkyu Houkokusho*, 7, 19-34.
- Dale, R., Fusaroli, R., Duran, N., & Richardson, D. C. (2013). The self-organization of human interaction. *Psychology of Learning and Motivation*, 59, 43-95.
- Degottex, G., Kane, J., Drugman, T., Raitio, T., & Scherer, S. (2014). *COVAREP - A collaborative voice analysis repository for speech technologies*. Paper presented at the IEEE International Conference on Acoustics, Speech and Signal Processing (ICASSP), Florence, Italy.
- Depape, A. M., Chen, A., Hall, G. B., & Trainor, L. J. (2012). Use of prosody and information structure in high functioning adults with autism in relation to language ability. *Frontiers in psychology*, 3, 72.
- Diehl, J. J., Berkovits, L., & Harrison, A. (2010). Is prosody a diagnostic and cognitive bellwether of autism spectrum disorders. *Speech disorders: Causes, treatments, and social effects*, 159-176.
- Diehl, J. J., & Paul, R. (2012). Acoustic differences in the imitation of prosodic patterns in children with autism spectrum disorders. *Research on Autism Spectrum Disorder*, 6(1), 123-134.

- Diehl, J. J., & Paul, R. (2013). Acoustic and perceptual measurements of prosody production on the profiling elements of prosodic systems in children by children with autism spectrum disorders. *Applied Psycholinguistics*, 34(01), 135-161.
- Diehl, J. J., Watson, D. G., Bennetto, L., McDonough, J., & Gunlogson, C. (2009). An acoustic analysis of prosody in high-functioning autism. *Applied Psycholinguistics*, 30, 385-404.
- Doebler, P., & Holling, H. (2015). Meta-Analysis of Diagnostic Accuracy with mada. 2015. R package version 0.5.7.
- Eadie, T. L., & Doyle, P. C. (2005). Classification of dysphonic voice: acoustic and auditory-perceptual measures. *Journal of Voice*, 19(1), 1-14.
- Ellis, P. D. (2010). *The essential guide to effect sizes: Statistical power, meta-analysis, and the interpretation of research results*: Cambridge University Press.
- Fay, W. H., & Schuler, A. L. (1980). *Emerging language in autistic children*: Hodder Arnold.
- Feldstein, S., Konstantareas, M., Oxman, J., & Webster, C. D. (1982). The chronography of interactions with autistic speakers: An initial report. *Journal of Communication Disorders*, 15(6), 451-460.
- Field, A. P., & Gillett, R. (2010). How to do a meta - analysis. *British Journal of Mathematical and Statistical Psychology*, 63(3), 665-694.
- Filipe, M. G., Frota, S., Castro, S. L., & Vicente, S. G. (2014). Atypical Prosody in Asperger Syndrome: Perceptual and Acoustic Measurements. *Journal of Autism and Developmental Disorders*, 44, 1972-1981.
- Fine, J., Bartolucci, G., Ginsberg, G., & Szatmari, P. (1991). The use of intonation to communicate in pervasive developmental disorders. *Journal of Child Psychology and Psychiatry*, 32(5), 771-782.
- Forbes-Riley, K., & Litman, D. J. (2004). *Predicting Emotion in Spoken Dialogue from Multiple Knowledge Sources*. Paper presented at the HLT-NAACL.
- Fosnot, S. M., & Jun, S. (1999). *Prosodic characteristics in children with stuttering or autism during reading and imitation*. Paper presented at the Proceedings of the 14th international congress of phonetic sciences.
- Fusaroli, R., Bang, D., & Weed, E. (2013). *Non-Linear Analyses of Speech and Prosody in Asperger's Syndrome*. Paper presented at the IMFAR 2013, San Sebastian.
- Fusaroli, R., Grossman, R. B., Cantio, C., Bilenberg, N., & Weed, E. (2015). *The temporal structure of the autistic voice: a cross-linguistic examination*. . Paper presented at the IMFAR 2015, Salt Lake City, United States.
- Fusaroli, R., Lambrechts, A., Yarrow, K., Maras, K., & Gaigg, S. (2015). *Voice patterns in adult English speakers with Autism Spectrum Disorder*. . Paper presented at the IMFAR 2015, Salt Lake City, United States.
- Fusaroli, R., Raczaszek-Leonardi, J., & Tylén, K. (2014). Dialog as interpersonal synergy. *New Ideas in Psychology*, 32, 147-157.
- Fusaroli, R., & Tylén, K. (2012). Carving Language for Social Coordination: a dynamic approach *Interaction Studies*, 13, 103-123.

- Fusaroli, R., & Tylén, K. (2016). Investigating conversational dynamics: Interactive alignment, Interpersonal synergy, and collective task performance. *Cognitive Science*, 40(1), 145-171.
- Goldfarb, W., Braunstein, P., & Lorge, I. (1956). Childhood schizophrenia: Symposium, 1955: 5. A study of speech patterns in a group of schizophrenic children. *American Journal of Orthopsychiatry*, 26(3), 544.
- Goldfarb, W., Goldfarb, N., Braunstein, P., & Scholl, H. (1972). Speech and language faults of schizophrenic children. *Journal of autism and childhood schizophrenia*, 2(3), 219-233.
- Green, H., & Tobin, Y. (2009). Prosodic analysis is difficult... but worth it: A study in high functioning autism. *International Journal of Speech-Language Pathology*, 11(4), 308-315.
- Grossman, R. B., Bemis, R. H., Skwerer, D. P., & Tager-Flusberg, H. (2010). Lexical and affective prosody in children with high-functioning autism. *Journal of Speech, Language, and Hearing Research*, 53(3), 778-793.
- Hastie, T., Tibshirani, R., & Friedman, J. H. (2009). *The elements of statistical learning: Data mining, inference, and prediction*. New York: Springer.
- Higgins, J. P., Thompson, S. G., Deeks, J. J., & Altman, D. G. (2003). Measuring inconsistency in meta-analyses. *BMJ: British Medical Journal*, 327(7414), 557.
- Hopkins, Z., Yuill, N., & Keller, B. (2015). Children with autism align syntax in natural conversation. *Applied Psycholinguistics*, 1-24.
- Hubbard, K., & Trauner, D. A. (2007). Intonation and emotion in autistic spectrum disorders. *Journal of psycholinguistic research*, 36(2), 159-173.
- Järvinen-Pasley, A., Peppé, S., King-Smith, G., & Heaton, P. (2008). The relationship between form and function level receptive prosodic abilities in autism. *Journal of Autism and Developmental Disorders*, 38(7), 1328-1340.
- Jiang, J. J., Zhang, Y., & McGilligan, C. (2006). Chaos in voice, from modeling to measurement. *J Voice*, 20(1), 2-17.
- Kakihara, Y., Takiguchi, T., Ariki, Y., Nakai, Y., & Takada, S. (2015). Investigation of Classification Using Pitch Features for Children with Autism Spectrum Disorders and Typically Developing Children. *American Journal of Signal Processing*, 5(1), 1-5.
- Kaland, C., Krahmer, E., & Swerts, M. (2012). *Contrastive intonation in autism: The effect of speaker-and listener-perspective*. Paper presented at the INTERSPEECH.
- Kanner, L. (1943). *Autistic disturbances of affective contact*: publisher not identified.
- Kiss, G., van Santen, J. P., Prud'hommeaux, E. T., & Black, L. M. (2012). *Quantitative Analysis of Pitch in Speech of Children with Neurodevelopmental Disorders*. Paper presented at the INTERSPEECH.
- Klin, A., Jones, W., Schultz, R., & Volkmar, F. (2003). The enactive mind, or from actions to cognition: lessons from autism. *Philosophical Transactions of the Royal Society B: Biological Sciences*, 358(1430), 345-360.
- Klopfenstein, M. (2009). Interaction between prosody and intelligibility. *International Journal of Speech-Language Pathology*, 11(4), 326-331.

- Lambrechts, A., Yarrow, K., Maras, K., & Gaigg, S. (2014). Impact of the temporal dynamics of speech and gesture on communication in Autism Spectrum Disorder. *Procedia-Social and Behavioral Sciences*, 126, 214-215.
- Laver, J., Hiller, S., & Beck, J. M. (1992). Acoustic waveform perturbations and voice disorders. *Journal of Voice*, 6(2), 115-126.
- Liscombe, J., Venditti, J., & Hirschberg, J. B. (2003). *Classifying subject ratings of emotional speech using acoustic features*.
- Lord, C. (2008). *ADOS: Autism Diagnostic Observation Schedule*: Western Psychological Services.
- Lord, C., Rutter, M., & Le Couteur, A. (1994). Autism Diagnostic Interview-Revised: a revised version of a diagnostic interview for caregivers of individuals with possible pervasive developmental disorders. *Journal of autism and developmental disorders*, 24(5), 659-685.
- Marchi, E., Schuller, B., Baron-Cohen, S., Golan, O., Bölte, S., Arora, P., & Hüb-Umbach, R. (2015). *Typicality and Emotion in the Voice of Children with Autism Spectrum Condition: Evidence Across Three Languages*. Paper presented at the Sixteenth Annual Conference of the International Speech Communication Association.
- Marwan, N., Carmen Romano, M., Thiel, M., & Kurths, J. (2007). Recurrence plots for the analysis of complex systems. *Physics Reports*, 438, 237-329.
- Maryn, Y., Roy, N., De Bodt, M., Van Cauwenberge, P., & Corthals, P. (2009). Acoustic measurement of overall voice quality: A meta-analysis. *The Journal of the Acoustical Society of America*, 126(5), 2619-2634.
- McCann, J., & Peppé, S. (2003). Prosody in autism spectrum disorders: a critical review. *International Journal of Language & Communication Disorders*, 38(4), 325-350.
- Michael, J., Bogart, K., Tylén, K., Krueger, J., Bech, M., Rosendahl Østergaard, J., & Fusaroli, R. (2015). Compensatory Strategies Enhance Rapport in Interactions Involving People with Möbius Syndrome. *Frontiers in Neurology*.
- Morett, L. M., O'Hearn, K., Luna, B., & Ghuman, A. S. (2015). Altered Gesture and Speech Production in ASD Detract from In-Person Communicative Quality. *Journal of autism and developmental disorders*, 1-15.
- Mushin, I., Stirling, L., Fletcher, J., & Wales, R. (2003). Discourse structure, grounding, and prosody in task-oriented dialogue. *Discourse Processes*, 35, 1-31.
- Nadig, A., & Shaw, H. (2012). Acoustic and perceptual measurement of expressive prosody in high-functioning autism: increased pitch range and what it means to listeners. *J Autism Dev Disord*, 42(4), 499-511.
- Nakai, Y., Takashima, R., Takiguchi, T., & Takada, S. (2014). Speech intonation in children with autism spectrum disorder. *Brain and Development*, 36(6), 516-522.
- Oller, D. K., Niyogi, P., Gray, S., Richards, J. A., Gilkerson, J., Xu, D., . . . Warren, S. F. (2010). Automated vocal analysis of naturalistic recordings from children with autism, language delay, and typical development. *Proc Natl Acad Sci U S A*, 107(30), 13354-13359.

- Orlikoff, R. F., & Kahane, J. C. (1991). Influence of mean sound pressure level on jitter and shimmer measures. *Journal of voice*, 5(2), 113-119.
- Paccia, J. M., & Curcio, F. (1982). Language processing and forms of immediate echolalia in autistic children. *Journal of Speech, Language, and Hearing Research*, 25(1), 42-47.
- Palmer, C. J., Paton, B., Kirkovski, M., Enticott, P. G., & Hohwy, J. (2015). Context sensitivity in action decreases along the autism spectrum: a predictive processing perspective. *Proceedings of the Royal Society of London B: Biological Sciences*, 282(1802), 20141557.
- Paul, R., Bianchi, N., Augustyn, A., Klin, A., & Volkmar, F. R. (2008). Production of syllable stress in speakers with autism spectrum disorders. *Research in Autism Spectrum Disorders*, 2(1), 110-124.
- Paul, R., Fuerst, Y., Ramsay, G., Chawarska, K., & Klin, A. (2011). Out of the mouths of babes: Vocal production in infant siblings of children with ASD. *Journal of Child Psychology and Psychiatry*, 52(5), 588-598.
- Paul, R., Shriberg, L. D., McSweeney, J., Cicchetti, D., Klin, A., & Volkmar, F. (2005a). Brief report: Relations between prosodic performance and communication and socialization ratings in high functioning speakers with autism spectrum disorders. *Journal of Autism and Developmental Disorders*, 35(6), 861-869.
- Paul, R., Shriberg, L. D., McSweeney, J., Cicchetti, D., Klin, A., & Volkmar, F. R. (2005b). Relations between prosodic performance and communication and socialization ratings in high functioning speakers with autism spectrum disorders. *Journal of Autism and Developmental Disorders*, 35, 861-869.
- Pickering, M. J., & Garrod, S. (2004). Toward a mechanistic psychology of dialogue. *Behavioral and Brain Sciences*, 27, 169-190.
- Pronovost, W., Wakstein, M. P., & Wakstein, D. J. (1966). A longitudinal study of the speech behavior and language comprehension of fourteen children diagnosed atypical or autistic. *Exceptional children*, 33, 19-26.
- Quintana, D. S. (2015). From pre-registration to publication: a non-technical primer for conducting a meta-analysis to synthesize correlational data. *Frontiers in Psychology*, 6.
- Riley, M. A., Bonnet, S., Kuznetsov, N., Wallot, S., & Gao, J. (2012). A tutorial introduction to adaptive fractal analysis. *Frontiers in physiology*, 3.
- Rodriguez, J. D., Perez, A., & Lozano, J. A. (2010). Sensitivity analysis of k-fold cross validation in prediction error estimation. *Pattern Analysis and Machine Intelligence, IEEE Transactions on*, 32(3), 569-575.
- Rogers, S. J., Hayden, D., Hepburn, S., Charlifue-Smith, R., Hall, T., & Hayes, A. (2006). Teaching young nonverbal children with autism useful speech: A pilot study of the Denver model and PROMPT interventions. *Journal of Autism and Developmental Disorders*, 36(8), 1007-1024.
- Santos, J. F., Brosh, N., Falk, T. H., Zwaigenbaum, L., Bryson, S. E., Roberts, G., ... Brian, J. (2013). *Very early detection of Autism Spectrum Disorders based on acoustic analysis of pre-verbal vocalizations of 18-month old toddlers*. Paper presented at the Acoustics, Speech and Signal Processing (ICASSP), 2013 IEEE International Conference on.



- Scharfstein, L. A., Beidel, D. C., Sims, V. K., & Finnell, L. R. (2011). Social skills deficits and vocal characteristics of children with social phobia or Asperger's disorder: a comparative study. *Journal of abnormal child psychology*, 39(6), 865-875.
- Sharda, M., Subhadra, T. P., Sahay, S., Nagaraja, C., Singh, L., Mishra, R., . . . Singh, N. C. (2010). Sounds of melody--pitch patterns of speech in autism. *Neuroscience letters*, 478(1), 42-45.
- Sheinkopf, S. J., Mundy, P., Oller, D. K., & Steffens, M. (2000). Vocal atypicalities of preverbal autistic children. *Journal of autism and developmental disorders*, 30(4), 345-354.
- Shriberg, L. D., Paul, R., Black, L. M., & van Santen, J. P. (2011). The hypothesis of apraxia of speech in children with autism spectrum disorder. *Journal of autism and developmental disorders*, 41(4), 405-426.
- Shriberg, L. D., Paul, R., McSweeney, J. L., Klin, A., Cohen, D. J., & Volkmar, F. R. (2001). Speech and prosody characteristics of adolescents and adults with high-functioning autism and Asperger syndrome. *Journal of Speech, Language, and Hearing Research*, 44(5), 1097-1115.
- Simmons, J. Q., & Baltaxe, C. (1975). Language patterns of adolescent autistics. *Journal of autism and childhood schizophrenia*, 5(4), 333-351.
- Slocombe, K. E., Alvarez, I., Branigan, H. P., Jellema, T., Burnett, H. G., Fischer, A., . . . Levita, L. (2013). Linguistic alignment in adults with and without Asperger's syndrome. *Journal of autism and developmental disorders*, 43(6), 1423-1436.
- Thurber, C., & Tager-Flusberg, H. (1993). Pauses in the narratives produced by autistic, mentally retarded, and normal children as an index of cognitive demand. *Journal of Autism and Developmental disorders*, 23(2), 309-322.
- Titze, I. R. (1994). *Principles of voice production*. Englewood Cliffs, N.J.: Prentice Hall.
- Travis, L. L., & Sigman, M. (1998). Social deficits and interpersonal relationships in autism. *Mental Retardation and Developmental Disabilities Research Reviews*, 4(2), 65-72.
- Tsanas, A., Little, M. A., McSharry, P. E., & Ramig, L. O. (2011). Nonlinear speech analysis algorithms mapped to a standard metric achieve clinically useful quantification of average Parkinson's disease symptom severity. *J R Soc Interface*, 8(59), 842-855.
- Van Bourgondien, M. E., & Woods, A. V. (1992). Vocational possibilities for high-functioning adults with autism *High-functioning individuals with autism*: Springer.
- Van de Cruys, S., Evers, K., Van der Hallen, R., Van Eylen, L., Boets, B., de-Wit, L., & Wagemans, J. (2014). Precise minds in uncertain worlds: Predictive coding in autism. *Psychological review*, 121(4), 649.
- Viechtbauer, W. (2010). Conducting meta-analyses in R with the metafor package. *Journal of Statistical Software*, 36(3), 1-48.
- Vosoughi, S., Goodwin, M. S., Washabaugh, B., & Roy, D. (2012). *A portable audio/video recorder for longitudinal study of child development*. Paper presented at the Proceedings of the 14th ACM international conference on Multimodal interaction.

- Wallace, M., Cleary, J., Buder, E., Oller, D., Sheinkopf, S., Mundy, P., & al., e. (2008). *An acoustic inspection of vocalizations in young children with ASD*. Paper presented at the International Meeting for Autism Research, London.
- Warlaumont, A. S., Richards, J. A., Gilkerson, J., & Oller, D. K. (2014). A Social Feedback Loop for Speech Development and Its Reduction in Autism. *Psychological science*, 0956797614531023.
- Weed, E., & Fusaroli, R. (submitted). Voice Patterns in Right Hemisphere Damage.
